# Supplementary material for: The combined use of B vitamins and probiotics promotes B vitamin absorption and increases Akkermansia abundance
Source: Royal Society of Chemistry journal article supplement (doi:10.1039/d4fo01805b), 2024-01-01
Supplement: d4fo01805b1.pdf [file d4fo01805b1.pdf]

## Supplementary Information

### **The combined use of B vitamins and probiotics promotes B vitamin absorption and gut microbiota restoration**

Lan Sang<sup>a,1</sup>, Shuyu Yang<sup>b,1</sup>, Ying Zhu<sup>a,1</sup>, Zhigang Zhu<sup>b</sup>, Binrui Yang<sup>b</sup>, Ziguang Li<sup>a</sup>, Xin Mao<sup>c</sup>, Siling Chen<sup>c</sup>, Chengsi Li<sup>c</sup>, Jun Du<sup>b</sup>, Xiao Zheng<sup>a</sup>, Hua He<sup>a\*</sup>, Jianheng Zheng<sup>b\*</sup>, Yin Huang<sup>c\*</sup>

<sup>1</sup> These authors contributed equally to this work.

\*Corresponding authors:

Hua He, Ph.D., Associate Professor

China Pharmaceutical University

Email: [huahe\\_cpupk@cpu.edu.cn](mailto:huahe_cpupk@cpu.edu.cn)

Jianheng Zheng, Ph.D.

Amway (Shanghai) Innovation & Science Co., Ltd.

Email: [jennie.zheng@amway.com](mailto:jennie.zheng@amway.com)

Yin Huang, Ph.D., Associate Professor

School of Pharmacy

China Pharmaceutical University

Email: [huangyin@cpu.edu.cn](mailto:huangyin@cpu.edu.cn)

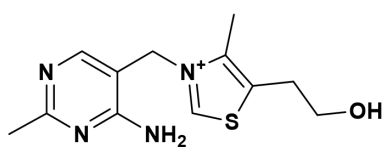

B1

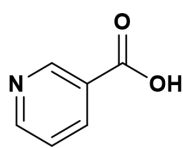

B3

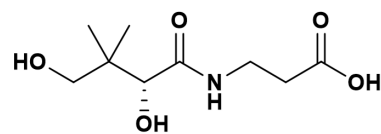

B5

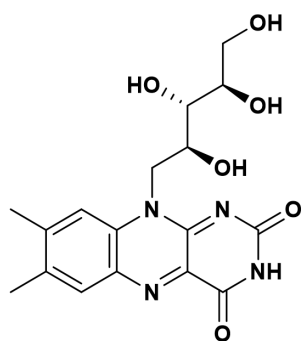

B2

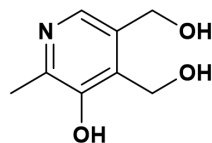

B6

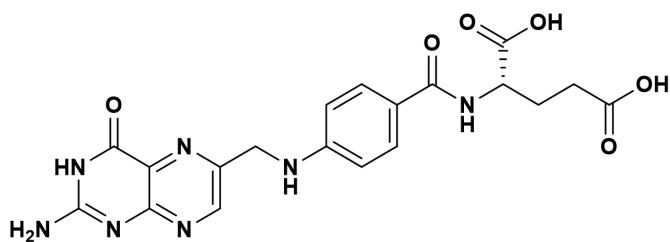

B9

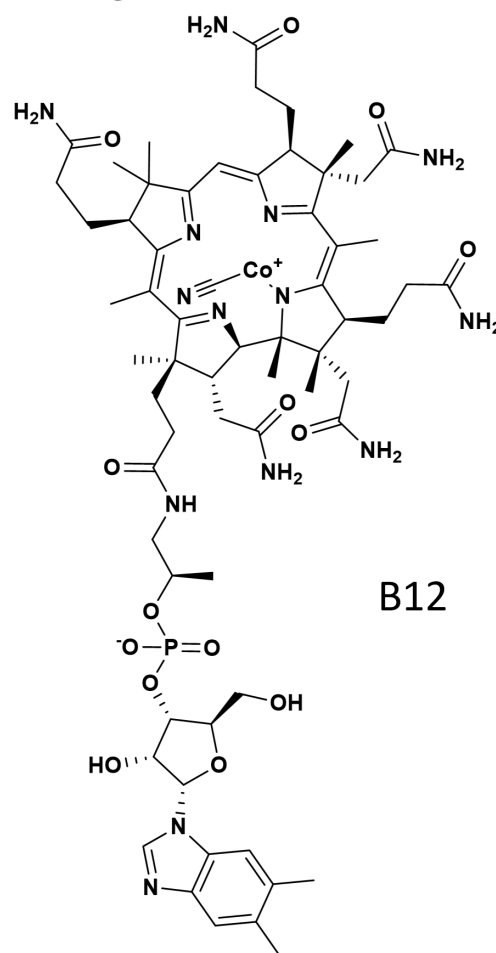

B12

Fig.S1 Molecule structures of B vitamins.

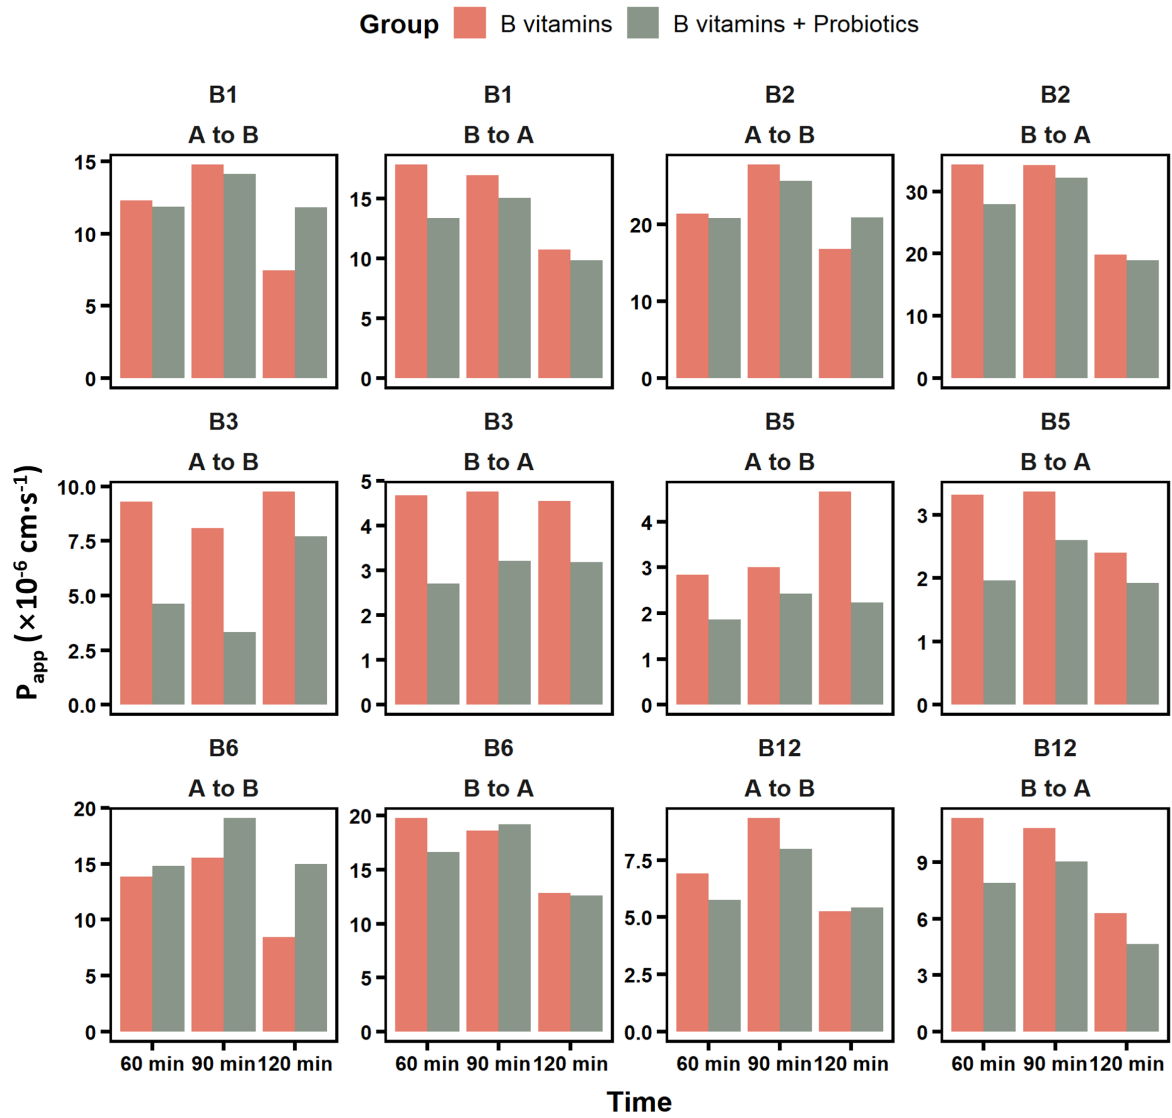

**Fig. S2** The impact of probiotics on the permeability of B vitamins in caco-2 cells. A indicates the apical side, while B indicates the basal side. Data are expressed as mean (n = 2).

**Table S1.** The calibration curve and MS transitions for each analyte.

| Analyte | T <sub>R</sub><br>(min) | Calibration Curve      | r <sup>2</sup> | Linear range<br>(ng/mL) | MRM         |        |
|---------|-------------------------|------------------------|----------------|-------------------------|-------------|--------|
|         |                         |                        |                |                         | Transition  | CE (V) |
| B1      | 1.27                    | y=4.96779x+0.0043820   | 0.9964         | 7.5-1500                | 265.1>122.0 | 15     |
| B2      | 8.62                    | y=0.215987x+0.0021384  | 0.9948         | 10-1000                 | 377.0>243.0 | 24     |
| B3      | 2.73                    | y=0.618146x+0.095806   | 0.9936         | 50-20000                | 124.1>80.0  | 24     |
| B5      | 4.74                    | y=1.16982x+0.0056099   | 0.9953         | 50-1000                 | 220.1>90.0  | 14     |
| B6      | 1.77                    | y=1.78348x+0.148824    | 0.9922         | 300-15000               | 170.1>152.0 | 13     |
| B9      | 8.70                    | y=0.617695x-0.0017542  | 0.9972         | 10-1000                 | 442.1>295.2 | 17     |
| B12     | 8.43                    | y=0.0395913x-0.0004553 | 0.9948         | 20-1000                 | 678.0>147.0 | 46     |
| IS      | 4.57                    |                        |                |                         | 127.1>84.0  | 24     |

**Table S2.** The non-compartmental analysis (NCA) parameters of each B vitamin in healthy rats (n = 8).

| Parameters | AUC <sub>0-∞</sub> | AUC <sub>0-t</sub> | T <sub>max</sub> | C <sub>max</sub> | CL <sub>z</sub> /F | MRT <sub>0-∞</sub> | MRT <sub>0-t</sub> | t <sub>1/2z</sub> | V <sub>z</sub> /F |                   |
|------------|--------------------|--------------------|------------------|------------------|--------------------|--------------------|--------------------|-------------------|-------------------|-------------------|
| Unit       | mg/L·h             | mg/L·h             | h                | mg/L             | L/h/kg             | h                  | h                  | h                 | L/kg              |                   |
| B1         | VB                 | 0.85 ± 0.36        | 0.8 ± 0.34       | 0.69 ± 0.26      | 0.26 ± 0.08        | 104.36 ± 65.13     | 3.39 ± 1.13        | 2.89 ± 0.9        | 2.05 ± 1          | 286.73 ± 191.28   |
|            | V + P              | 2.34 ± 0.82        | 2.29 ± 0.88      | 0.88 ± 0.23      | 0.52 ± 0.18        | 33.53 ± 12.12      | 6.75 ± 3.2         | 5.3 ± 1.23        | 4.63 ± 5.88       | 256.28 ± 418.18   |
|            | FC                 | 2.76               | 2.84             | 1.27             | 2.05               | 0.32               | 1.99               | 1.83              | 2.26              | 0.89              |
|            | P val              | 0.000              | 0.000            | 0.161            | 0.003              | 0.000              | 0.002              | 0.001             | 0.180             | 0.195             |
| B2         | VB                 | 2.41 ± 0.77        | 0.92 ± 0.08      | 1.12 ± 0.74      | 0.06 ± 0.01        | 4.88 ± 2.79        | 50.8 ± 19.92       | 10.86 ± 0.48      | 39.63 ± 8.59      | 216.97 ± 26.84    |
|            | V + P              | 4.91 ± 6.08        | 0.81 ± 0.12      | 2.12 ± 1.79      | 0.06 ± 0.01        | 5.41 ± 4.67        | 128.54 ± 171.71    | 11.19 ± 0.66      | 89.36 ± 120       | 233.47 ± 44.15    |
|            | FC                 | 2.04               | 0.89             | 1.89             | 0.97               | 1.11               | 2.53               | 1.03              | 2.25              | 1.08              |
|            | P val              | 0.608              | 0.064            | 0.202            | 0.610              | 0.608              | 0.448              | 0.267             | 0.760             | 0.470             |
| B3         | VB                 | 3.75 <sup>a</sup>  | 5.32 ± 2.31      | 0.5 <sup>a</sup> | 8.04 ± 4.28        | 2.66 <sup>a</sup>  | 3.66 <sup>a</sup>  | 2.14 <sup>a</sup> | 2.38 <sup>a</sup> | 9.15 <sup>a</sup> |
|            | V + P              | NA <sup>b</sup>    | 7.31 ± 1.34      | 0.38 ± 0.17      | 10.78 ± 2.22       | NA <sup>b</sup>    | NA <sup>b</sup>    | NA <sup>b</sup>   | NA <sup>b</sup>   | NA <sup>b</sup>   |
|            | FC                 | NA <sup>c</sup>    | 1.37             | 0.75             | 1.34               | NA <sup>c</sup>    | NA <sup>c</sup>    | NA <sup>c</sup>   | NA <sup>c</sup>   | NA <sup>c</sup>   |
|            | P val              | NA <sup>c</sup>    | 0.050            | 0.075            | 0.104              | NA <sup>c</sup>    | NA <sup>c</sup>    | NA <sup>c</sup>   | NA <sup>c</sup>   | NA <sup>c</sup>   |
| B5         | VB                 | 2.08 ± 1.01        | 1.28 ± 0.72      | 3.25 ± 0.71      | 0.17 ± 0.06        | 12.1 ± 6.56        | 15.46 ± 8.44       | 5.96 ± 1.94       | 10.84 ± 6.76      | 154.04 ± 91.39    |
|            | V + P              | 2.02 ± 0.7         | 1.9 ± 0.71       | 3.25 ± 0.71      | 0.26 ± 0.07        | 10.98 ± 3.67       | 8.26 ± 2.56        | 6.87 ± 1.78       | 4.37 ± 2.95       | 64.43 ± 40.49     |
|            | FC                 | 0.97               | 1.48             | 1.00             | 1.52               | 0.91               | 0.53               | 1.15              | 0.40              | 0.42              |
|            | P val              | 0.894              | 0.089            | 1.000            | 0.012              | 0.894              | 0.054              | 0.353             | 0.036             | 0.010             |
| B6         | VB                 | 8.37 ± 1.97        | 8.37 ± 1.99      | 0.56 ± 0.18      | 5.63 ± 1.76        | 2.62 ± 1.12        | 1.4 ± 0.22         | 1.37 ± 0.18       | 1.26 ± 0.61       | 5.61 ± 6.37       |
|            | V + P              | 8.9 ± 0.72         | 8.89 ± 0.71      | 0.62 ± 0.23      | 6.43 ± 1.05        | 2.26 ± 0.18        | 1.02 ± 0.09        | 1.02 ± 0.09       | 0.7 ± 0.74        | 2.19 ± 2.11       |
|            | FC                 | 1.06               | 1.06             | 1.11             | 1.14               | 0.86               | 0.73               | 0.75              | 0.56              | 0.39              |
|            | P val              | 0.443              | 0.441            | 0.587            | 0.251              | 0.443              | 0.000              | 0.000             | 0.014             | 0.015             |
| B9         | VB                 | 2.04 ± 0.21        | 1.38 ± 0.42      | 1.19 ± 0.53      | 0.41 ± 0.07        | 4.96 ± 0.54        | 4.64 ± 1.46        | 2.64 ± 0.1        | 2.74 ± 1.08       | 19.36 ± 7.22      |
|            | V + P              | 2.33 ± 0.66        | 1.71 ± 0.2       | 2.25 ± 0.89      | 0.4 ± 0.08         | 4.57 ± 1.13        | 6.83 ± 4.52        | 3.58 ± 0.8        | 4.28 ± 3.65       | 23.8 ± 13.46      |
|            | FC                 | 1.14               | 1.24             | 1.89             | 0.97               | 0.92               | 1.47               | 1.35              | 1.56              | 1.23              |
|            | P val              | 0.327              | 0.126            | 0.022            | 0.772              | 0.327              | 0.276              | 0.004             | 0.452             | 0.582             |
| B12        | VB                 | 0.17 ± 0.08        | 0.08 ± 0.02      | 0.56 ± 0.18      | 0.05 ± 0.01        | 132.73 ± 41.2      | 3.81 ± 3.41        | 1.15 ± 0.34       | 2.58 ± 2.37       | 387.63 ± 118.7    |
|            | V + P              | 0.19 ± 0.05        | 0.1 ± 0.03       | 0.48 ± 0.26      | 0.09 ± 0.02        | 108.95 ± 26.69     | 2.41 ± 1.48        | 0.9 ± 0.04        | 1.57 ± 1.08       | 222.39 ± 103.87   |
|            | FC                 | 1.12               | 1.21             | 0.85             | 1.64               | 0.82               | 0.63               | 0.79              | 0.61              | 0.57              |
|            | P val              | 0.351              | 0.213            | 0.369            | 0.000              | 0.349              | 0.236              | 0.055             | 0.207             | 0.018             |

<sup>a</sup> Standard deviation was not available due to the limited number of detectable samples.

<sup>b</sup> The mean value of parameter and standard deviation were not available due to the limited number of detectable samples.

<sup>c</sup> Fold change and p value were not available due to the limited number of detectable samples.

All NCA parameters except T<sub>max</sub> were log transformed prior to analysis. All NAC parameters except T<sub>max</sub> were analyzed by Student's t test. T<sub>max</sub> was analyzed by Wilcoxon test. Data of all NCA parameters are expressed as mean±SD. VB, B vitamins. V + P, B vitamins + Probiotics. FC, fold change. NA, not available.

**Table S3.** The non-compartmental analysis (NCA) parameters of each B vitamin in pseudo-germ-free rats (n = 6).

| Parameters | AUC <sub>0-∞</sub> | AUC <sub>0-t</sub> | T <sub>max</sub> | C <sub>max</sub> | CL <sub>z</sub> /F | MRT <sub>0-∞</sub> | MRT <sub>0-t</sub> | t <sub>1/2z</sub> | V <sub>z</sub> /F |                    |
|------------|--------------------|--------------------|------------------|------------------|--------------------|--------------------|--------------------|-------------------|-------------------|--------------------|
| Unit       | mg/L·h             | mg/L·h             | h                | mg/L             | L/h/kg             | h                  | h                  | h                 | L/kg              |                    |
| B1         | VB                 | 6.15 ± 1.36        | 3.63 ± 0.2       | 0.92 ± 0.23      | 0.82 ± 0.06        | 11.86 ± 2.2        | 9.51 ± 4.89        | 3.18 ± 0.06       | 6.9 ± 3.84        | 106.79 ± 31.07     |
|            | V + P              | 20.22 ± 32.26      | 3.8 ± 0.73       | 0.53 ± 0.24      | 0.85 ± 0.2         | 10.87 ± 5.24       | 37.52 ± 66.03      | 3.3 ± 0.18        | 26.37 ± 45.99     | 109.93 ± 20.66     |
|            | FC                 | 3.29               | 1.05             | 0.58             | 1.05               | 0.92               | 3.94               | 1.04              | 3.82              | 1.03               |
|            | P val              | 0.451              | 0.739            | 0.033            | 0.798              | 0.451              | 0.465              | 0.206             | 0.462             | 0.755              |
| B2         | VB                 | 1.7 ± 0.15         | 0.88 ± 0.15      | 1.56 ± 1.17      | 0.18 ± 0.04        | 5.98 ± 0.55        | 10.81 ± 3.06       | 3.55 ± 0.24       | 7.36 ± 2.36       | 63.42 ± 20.12      |
|            | V + P              | 1.64 ± 0.93        | 0.91 ± 0.22      | 1.17 ± 0.62      | 0.17 ± 0.05        | 7.87 ± 3.32        | 10.49 ± 8.5        | 3.59 ± 0.21       | 9.33 ± 5.48       | 65.22 ± 27.09      |
|            | FC                 | 0.96               | 1.03             | 0.75             | 0.96               | 1.32               | 0.97               | 1.01              | 1.27              | 1.03               |
|            | P val              | 0.444              | 0.919            | 0.673            | 0.974              | 0.443              | 0.339              | 0.954             | 0.999             | 0.875              |
| B3         | VB                 | NA <sup>b</sup>    | 7.88 ± 0.87      | 0.39 ± 0.16      | 10.68 ± 1.23       | NA <sup>b</sup>    | NA <sup>b</sup>    | NA <sup>b</sup>   | NA <sup>b</sup>   | NA <sup>b</sup>    |
|            | V + P              | NA <sup>b</sup>    | 7.65 ± 1.72      | 0.39 ± 0.16      | 11.64 ± 2.94       | NA <sup>b</sup>    | NA <sup>b</sup>    | NA <sup>b</sup>   | NA <sup>b</sup>   | NA <sup>b</sup>    |
|            | FC                 | NA <sup>c</sup>    | 0.97             | 1.00             | 1.09               | NA <sup>c</sup>    | NA <sup>c</sup>    | NA <sup>c</sup>   | NA <sup>c</sup>   | NA <sup>c</sup>    |
|            | P val              | NA <sup>c</sup>    | 0.677            | 1.000            | 0.615              | NA <sup>c</sup>    | NA <sup>c</sup>    | NA <sup>c</sup>   | NA <sup>c</sup>   | NA <sup>c</sup>    |
| B5         | VB                 | 3.46 ± 0.81        | 2.12 ± 0.36      | 1.67 ± 1.11      | 0.38 ± 0.08        | 6.06 ± 1.19        | 8.49 ± 2.92        | 3.67 ± 0.15       | 5.39 ± 2.2        | 44.59 ± 10.82      |
|            | V + P              | 3.08 ± 0.75        | 1.92 ± 0.25      | 2.17 ± 0.37      | 0.34 ± 0.06        | 6.9 ± 1.67         | 8.01 ± 1.71        | 3.57 ± 0.07       | 5.26 ± 1.37       | 49.3 ± 4.21        |
|            | FC                 | 0.89               | 0.91             | 1.30             | 0.90               | 1.14               | 0.94               | 0.97              | 0.98              | 1.11               |
|            | P val              | 0.420              | 0.333            | 0.116            | 0.489              | 0.420              | 0.844              | 0.259             | 0.957             | 0.362              |
| B6         | VB                 | 17.02 ± 1.37       | 16.39 ± 1.24     | 0.75 ± 0.25      | 10.25 ± 1.04       | 1.18 ± 0.09        | 1.1 ± 0.1          | 0.99 ± 0.05       | 0.56 ± 0.13       | 0.95 ± 0.18        |
|            | V + P              | 13.35 ± 1.29       | 12.39 ± 1.33     | 0.44 ± 0.12      | 9.69 ± 1.29        | 1.51 ± 0.17        | 1.03 ± 0.15        | 0.86 ± 0.13       | 0.58 ± 0.12       | 1.24 ± 0.19        |
|            | FC                 | 0.78               | 0.76             | 0.59             | 0.95               | 1.28               | 0.94               | 0.87              | 1.03              | 1.30               |
|            | P val              | 0.002              | 0.001            | 0.054            | 0.434              | 0.002              | 0.372              | 0.080             | 0.857             | 0.032              |
| B9         | VB                 | 1.78 ± 0.55        | 1.37 ± 0.3       | 1.17 ± 0.37      | 0.4 ± 0.1          | 6.21 ± 2.07        | 5.15 ± 2.53        | 2.77 ± 0.4        | 3.67 ± 1.71       | 29.45 ± 9.4        |
|            | V + P              | 4.06 ± 4.06        | 1.48 ± 1.48      | 1 ± 1            | 0.44 ± 0.44        | 5.88 ± 5.88        | 14.15 ± 14.15      | 2.71 ± 2.71       | 10.35 ± 10.35     | 33.32 ± 33.32      |
|            | FC                 | 2.28               | 1.08             | 0.86             | 1.11               | 0.95               | 2.75               | 0.98              | 2.82              | 1.13               |
|            | P val              | 0.532              | 0.843            | 0.389            | 0.726              | 0.532              | 0.554              | 0.771             | 0.558             | 0.829              |
| B12        | VB                 | NA <sup>b</sup>    | 0.01 ± 0.02      | 0.17 ± 0.24      | 0.07 <sup>a</sup>  | NA <sup>b</sup>    | NA <sup>b</sup>    | NA <sup>b</sup>   | NA <sup>b</sup>   | NA <sup>b</sup>    |
|            | V + P              | 1.27 <sup>a</sup>  | 0.15 ± 0.26      | 0.61 ± 0.3       | 0.12 ± 0.08        | 15.75 <sup>a</sup> | 3.57 <sup>a</sup>  | 1.42 <sup>a</sup> | 2.43 <sup>a</sup> | 55.27 <sup>a</sup> |
|            | FC                 | NA <sup>c</sup>    | 13.78            | 3.67             | 1.73               | NA <sup>c</sup>    | NA <sup>c</sup>    | NA <sup>c</sup>   | NA <sup>c</sup>   | NA <sup>c</sup>    |
|            | P val              | NA <sup>c</sup>    | 0.412            | 0.034            | 0.153              | NA <sup>c</sup>    | NA <sup>c</sup>    | NA <sup>c</sup>   | NA <sup>c</sup>   | NA <sup>c</sup>    |

<sup>a</sup> Standard deviation was not available due to the limited number of detectable samples.

<sup>b</sup> The mean value of parameter and standard deviation were not available due to the limited number of detectable samples.

<sup>c</sup> Fold change and p value were not available due to the limited number of detectable samples.

All NCA parameters except T<sub>max</sub> were log transformed prior to analysis. All NAC parameters except T<sub>max</sub> were analyzed by Student's t test. T<sub>max</sub> was analyzed by Wilcoxon test. Data of all NCA parameters are expressed as mean±SD. VB, B vitamins. V + P, B vitamins + Probiotics. FC, fold change. NA, not available.

**Table S4.** Multiple-group comparison of Chao index among five groups (n = 5).

| Chao index                                   |          |          |
|----------------------------------------------|----------|----------|
| Groups for comparison                        | P value* | Q value* |
| Model <i>vs</i> Control                      | 0.002    | 0.023    |
| Probiotics <i>vs</i> Control                 | 0.001    | 0.013    |
| B vitamins <i>vs</i> Control                 | 0.000    | 0.000    |
| B vitamins + Probiotics <i>vs</i> Control    | 0.000    | 0.000    |
| Probiotics <i>vs</i> Model                   | 0.806    | 1.000    |
| B vitamins <i>vs</i> Model                   | 0.060    | 0.597    |
| B vitamins + Probiotics <i>vs</i> Model      | 0.000    | 0.002    |
| B vitamins <i>vs</i> Probiotics              | 0.096    | 0.961    |
| B vitamins + Probiotics <i>vs</i> Probiotics | 0.000    | 0.003    |
| B vitamins + Probiotics <i>vs</i> B vitamins | 0.018    | 0.180    |

\* Statistical analysis was conducted using Conover's all-pairs rank comparison test with Bonferroni correction.

**Table S5.** Multiple-group comparison of the relative abundance of the gut microbat at the phylum level (n = 5).

| Groups for comparison                        | Bacteroidetes |          | Firmicutes |          | Verrucomicrobia |          | Proteobacteria |          |
|----------------------------------------------|---------------|----------|------------|----------|-----------------|----------|----------------|----------|
|                                              | P value*      | Q value* | P value*   | Q value* | P value*        | Q value* | P value*       | Q value* |
| Model <i>vs</i> Control                      | 0.000         | 0.000    | 0.013      | 0.134    | 0.073           | 0.731    | 0.001          | 0.013    |
| Probiotics <i>vs</i> Control                 | 0.000         | 0.000    | 0.000      | 0.000    | 0.000           | 0.003    | 0.000          | 0.003    |
| B vitamins <i>vs</i> Control                 | 0.000         | 0.001    | 0.000      | 0.001    | 0.001           | 0.014    | 0.003          | 0.027    |
| B vitamins + Probiotics <i>vs</i> Control    | 0.176         | 1.000    | 0.000      | 0.000    | 0.000           | 0.000    | 0.000          | 0.000    |
| Probiotics <i>vs</i> Model                   | 1.000         | 1.000    | 0.000      | 0.000    | 0.020           | 0.203    | 0.558          | 1.000    |
| B vitamins <i>vs</i> Model                   | 0.562         | 1.000    | 0.048      | 0.476    | 0.085           | 0.849    | 0.769          | 1.000    |
| B vitamins + Probiotics <i>vs</i> Model      | 0.001         | 0.007    | 0.000      | 0.000    | 0.000           | 0.000    | 0.003          | 0.027    |
| B vitamins <i>vs</i> Probiotics              | 0.562         | 1.000    | 0.003      | 0.034    | 0.486           | 1.000    | 0.382          | 1.000    |
| B vitamins + Probiotics <i>vs</i> Probiotics | 0.001         | 0.007    | 0.431      | 1.000    | 0.009           | 0.085    | 0.010          | 0.104    |
| B vitamins + Probiotics <i>vs</i> B vitamins | 0.003         | 0.029    | 0.001      | 0.005    | 0.002           | 0.017    | 0.001          | 0.013    |

\* Statistical analysis was conducted using Conover's all-pairs rank comparison test with Bonferroni correction.



**Table S6.** Multiple-group comparison of the relative abundance of the gut microbat at the genus level (n = 5).

| Groups for comparison                 | <i>Akkermansia</i> |          | <i>Bacteroides</i> |          | <i>Blautia</i> |          | <i>Flavonifractor</i> |          |
|---------------------------------------|--------------------|----------|--------------------|----------|----------------|----------|-----------------------|----------|
|                                       | P value*           | Q value* | P value*           | Q value* | P value*       | Q value* | P value*              | Q value* |
| Model vs Control                      | 0.073              | 0.731    | 0.000              | 0.000    | 0.000          | 0.000    | 0.000                 | 0.005    |
| Probiotics vs Control                 | 0.000              | 0.003    | 0.000              | 0.000    | 0.005          | 0.048    | 0.000                 | 0.000    |
| B vitamins vs Control                 | 0.001              | 0.014    | 0.000              | 0.000    | 0.000          | 0.000    | 0.015                 | 0.152    |
| B vitamins + Probiotics vs Control    | 0.000              | 0.000    | 0.051              | 0.510    | 0.543          | 1.000    | 0.000                 | 0.000    |
| Probiotics vs Model                   | 0.020              | 0.203    | 0.879              | 1.000    | 0.011          | 0.114    | 0.006                 | 0.057    |
| B vitamins vs Model                   | 0.085              | 0.849    | 1.000              | 1.000    | 0.543          | 1.000    | 0.148                 | 1.000    |
| B vitamins + Probiotics vs Model      | 0.000              | 0.000    | 0.001              | 0.015    | 0.000          | 0.000    | 0.003                 | 0.025    |
| B vitamins vs Probiotics              | 0.486              | 1.000    | 0.879              | 1.000    | 0.043          | 0.425    | 0.000                 | 0.002    |
| B vitamins + Probiotics vs Probiotics | 0.009              | 0.085    | 0.002              | 0.021    | 0.019          | 0.189    | 0.727                 | 1.000    |
| B vitamins + Probiotics vs B vitamins | 0.002              | 0.017    | 0.001              | 0.015    | 0.000          | 0.001    | 0.000                 | 0.001    |

\* Statistical analysis was conducted using Conover's all-pairs rank comparison test with Bonferroni correction.
